# Supplementary material
Source: publisher site journal article supplement (https://www.e-cmh.org/upload/media/cmh-2023-0449-Supplementary-Fig-1.pdf)
Supplement: Supplementary file 1 [file cmh-2023-0449-Supplementary-Fig-1.pdf]

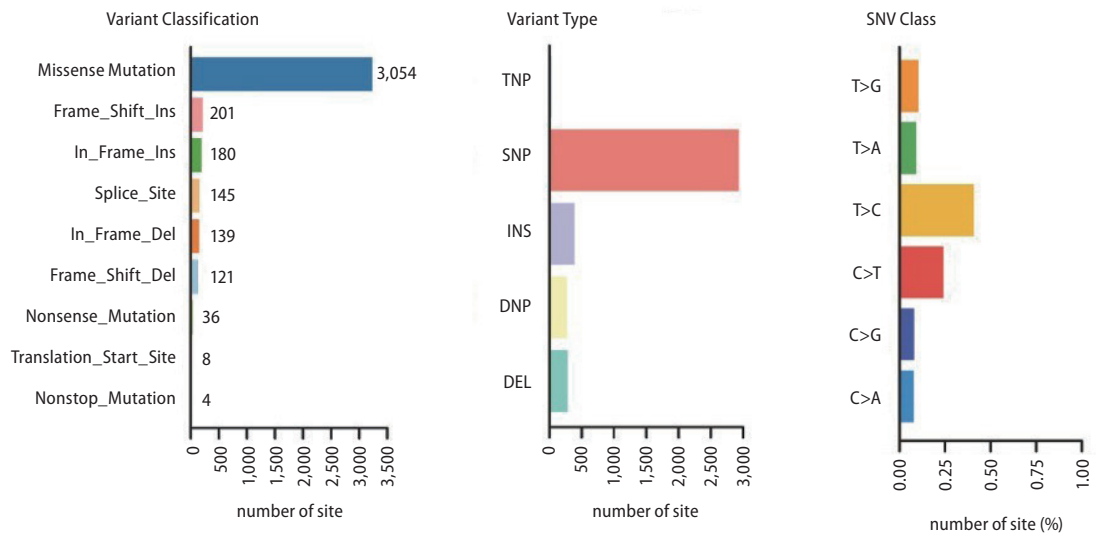

**Supplementary Fig. 1.** Summary of 3,888 somatic variant callings. Bar plots showing variant classification, variant type, and SNV class for variants obtained from 120 MASLD patients.
